# Supplementary material for: Intestinal organoids for assessing nutrient transport, sensing and incretin secretion
Source: PubMed Central journal article supplement (PMC4652176; doi:10.1038/srep16831), 2015-11-19
Supplement: srep16831-s1.pdf [file srep16831-s1.pdf]

# Supplementary information

**Manuscript title:**

Intestinal organoids for assessing nutrient transport, sensing and incretin secretion

**Authors list:**

Tamara Zietek, Eva Rath, Dirk Haller, Hannelore Daniel

# Supplementary Table S1

**Supplementary Table S1: Statistical analyses of transport and hormone secretion studies.** Overview of statistical analyses and calculated p-values for the data depicted in **Fig. 1c-e**, **Fig. 2b-d** and **Fig. 2f,g**.

| Figure          | Comparison                                                                     | Test                                           | P-Value                                 |
|-----------------|--------------------------------------------------------------------------------|------------------------------------------------|-----------------------------------------|
| <b>1c left</b>  | WT Glucose vs.<br>WT Glucose + Phloridzin                                      | Two Way ANOVA<br>followed by Tukey test        | <0.001                                  |
|                 | WT Glucose vs.<br>SGLT1 <sup>-/-</sup> Glucose                                 |                                                | <0.001                                  |
|                 | SGLT1 <sup>-/-</sup> Glucose vs.<br>SGLT1 <sup>-/-</sup> Glucose + Phloretin   |                                                | 0.040                                   |
|                 |                                                                                |                                                |                                         |
| <b>1c mid</b>   | WT $\alpha$ -MDG vs.<br>WT $\alpha$ -MDG + Phloridzin                          | Two Way ANOVA<br>followed by Tukey test        | <0.001                                  |
|                 | WT $\alpha$ -MDG vs.<br>SGLT1 <sup>-/-</sup> $\alpha$ -MDG                     |                                                | <0.001                                  |
|                 |                                                                                |                                                |                                         |
| <b>1c right</b> | WT Fructose vs.<br>GLUT5 <sup>-/-</sup> Fructose                               | Two Way ANOVA<br>followed by Tukey test        | <0.001                                  |
|                 | GLUT5 <sup>-/-</sup> Fructose vs.<br>GLUT5 <sup>-/-</sup> Fructose + Phloretin |                                                | 0.018                                   |
|                 |                                                                                |                                                |                                         |
| <b>1d</b>       | WT Gly-Sar vs.<br>PEPT1 <sup>-/-</sup> Gly-Sar                                 | Student's t test (unpaired)                    | 0.008                                   |
| <b>1e</b>       | WT Gly-Sar vs.<br>WT Gly-Sar + Gly-Gly                                         | One Way ANOVA followed by<br>Holm-Sidak method | 0.009                                   |
|                 | WT Gly-Sar vs.<br>WT Gly-Sar + Cefadroxil                                      |                                                | <0.001                                  |
|                 |                                                                                |                                                |                                         |
| <b>2b</b>       | Duodenum vs. Jejunum                                                           | One Way ANOVA followed by<br>Holm-Sidak method | 0.034                                   |
|                 | Duodenum vs. Ileum                                                             |                                                | <0.001                                  |
|                 | Jejunum vs. Ileum                                                              |                                                | <0.001                                  |
| <b>2c</b>       | Basal vs. Glucose                                                              | One Way ANOVA followed by<br>Holm-Sidak method | <0.001                                  |
|                 | Basal vs. Gly-Sar                                                              |                                                | 0.013                                   |
|                 | Basal vs. DCA                                                                  |                                                | <0.001                                  |
| <b>2d left</b>  | WT Basal vs. Gly-Sar                                                           | One Way ANOVA followed by<br>Holm-Sidak method | 0.006                                   |
|                 | WT Basal vs. F/I                                                               |                                                | <0.001                                  |
|                 | PEPT1 <sup>-/-</sup> Basal vs. Gly-Sar                                         | One Way ANOVA followed by<br>Holm-Sidak method | <b>0.876</b>                            |
|                 | PEPT1 <sup>-/-</sup> Basal vs. F/I                                             |                                                | <0.001                                  |
|                 | WT F/I vs. PEPT1 <sup>-/-</sup> F/I                                            |                                                | Two Way ANOVA<br>followed by Tukey test |
| <b>2d right</b> | WT Basal vs. Glucose                                                           | One Way ANOVA followed by<br>Holm-Sidak method | 0.003                                   |
|                 | WT Basal vs. F/I                                                               |                                                | <0.001                                  |
|                 | SGLT1 <sup>-/-</sup> Basal vs. Glucose                                         | One Way ANOVA followed by<br>Holm-Sidak method | <b>0.964</b>                            |
|                 | SGLT1 <sup>-/-</sup> Basal vs. F/I                                             |                                                | <0.001                                  |
|                 | WT F/I vs. SGLT1 <sup>-/-</sup> F/I                                            |                                                | Two Way ANOVA<br>followed by Tukey test |
| <b>2f</b>       | Duodenum vs. Jejunum                                                           | One Way ANOVA followed by<br>Holm-Sidak method | <0.001                                  |
|                 | Duodenum vs. Ileum                                                             |                                                | <0.001                                  |
|                 | Jejunum vs. Ileum                                                              |                                                | <0.001                                  |
| <b>2g</b>       | WT Basal vs. Glucose                                                           | One Way ANOVA followed by<br>Holm-Sidak method | 0.043                                   |
|                 | WT Basal vs. F/I                                                               |                                                | <0.001                                  |
|                 | SGLT1 <sup>-/-</sup> Basal vs. Glucose                                         | One Way ANOVA followed by<br>Holm-Sidak method | <b>0.746</b>                            |
|                 | SGLT1 <sup>-/-</sup> Basal vs. F/I                                             |                                                | <0.001                                  |
|                 | WT F/I vs. SGLT1 <sup>-/-</sup> F/I                                            |                                                | Two Way ANOVA<br>followed by Tukey test |

# Supplementary Figure S1

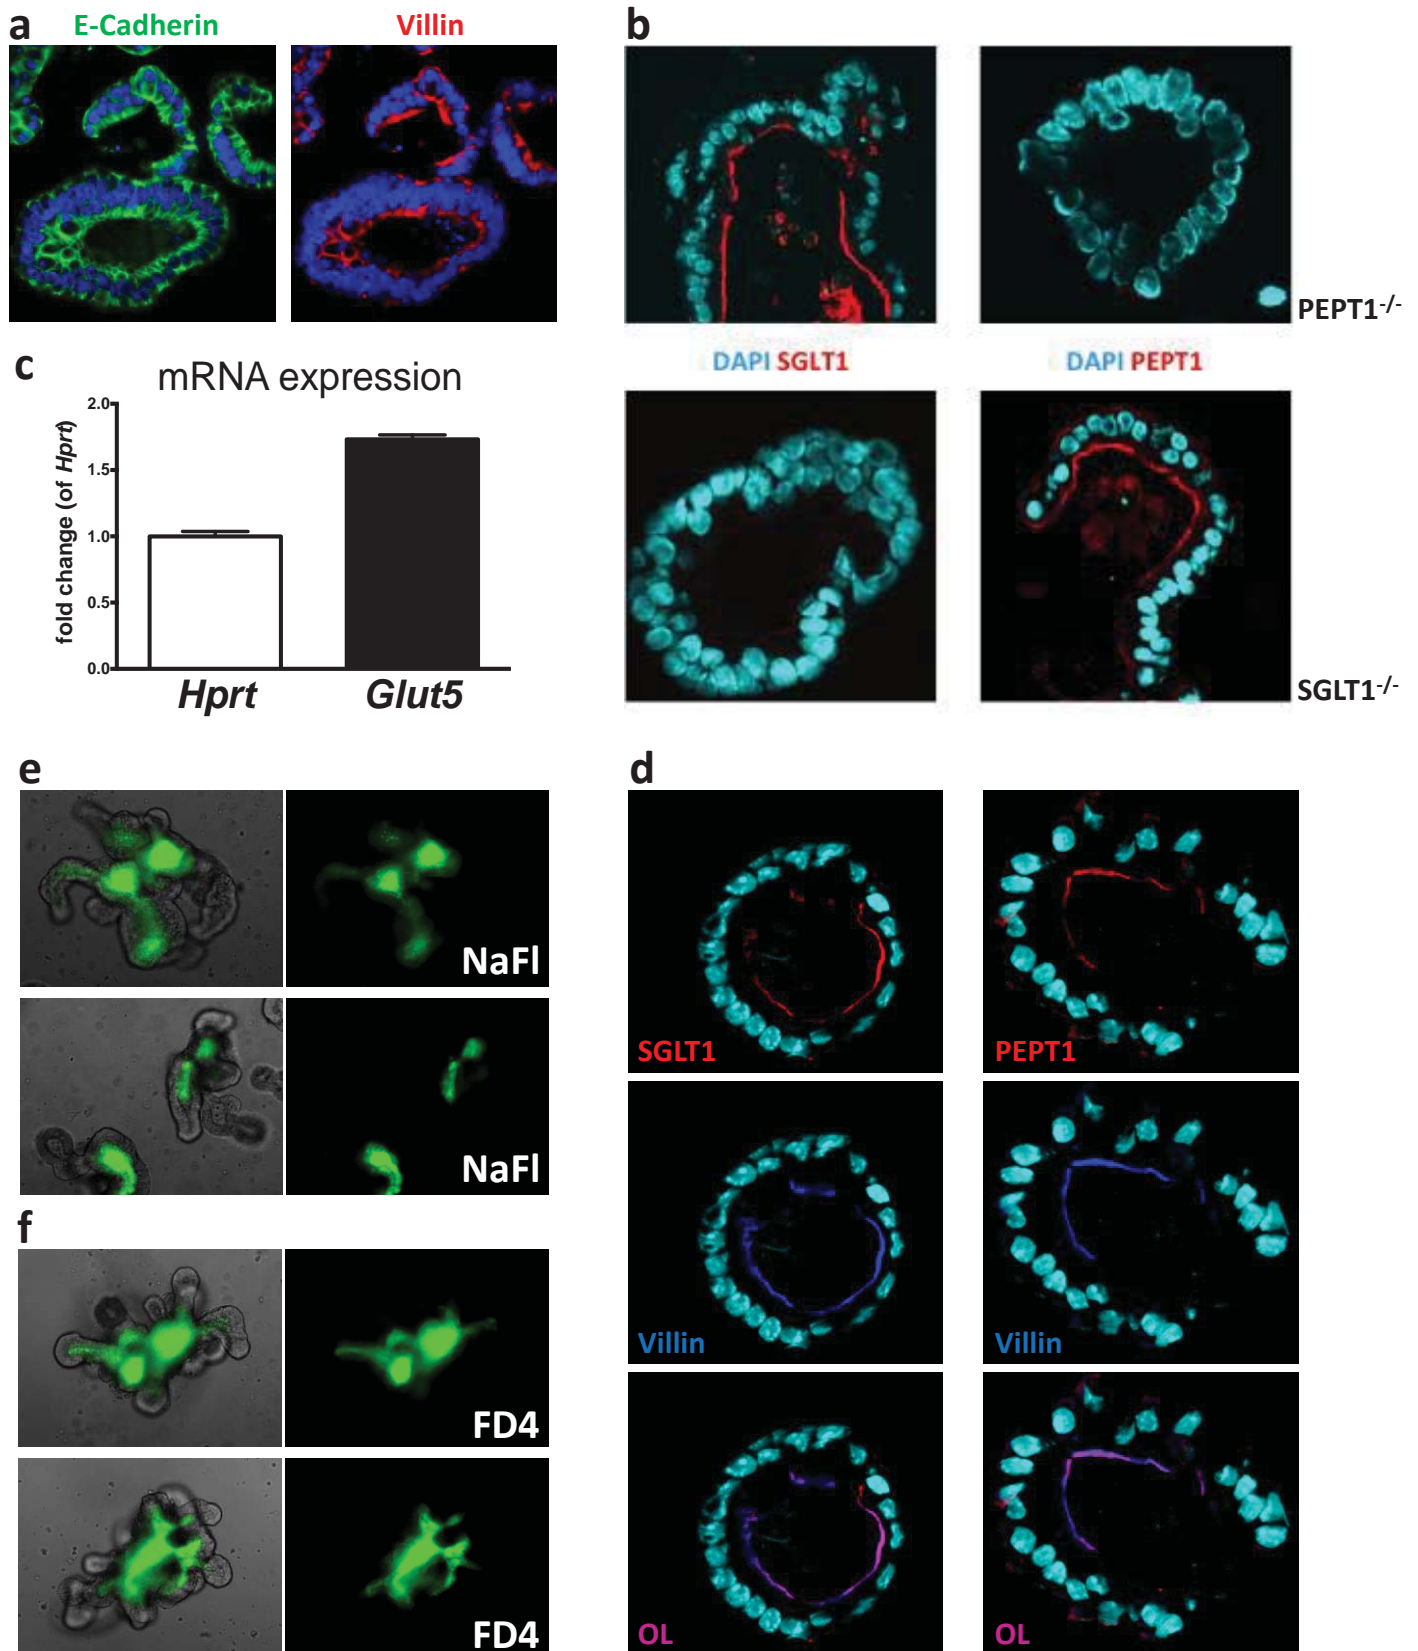

**Supplementary Figure S1: Cell polarization, specificity of PEPT1 and SGLT1 antibodies, *Glut5* expression, and permeability of the organoid epithelium.**

**(a)** Immunofluorescent staining of villin (red) and E-Cadherin (green) shows polarized intestinal epithelial cells; nuclei (blue). **(b)** Organoids derived from PEPT1<sup>-/-</sup> (upper panel) and SGLT1<sup>-/-</sup> (lower panel) mice demonstrate no staining to the corresponding PEPT1 or SGLT1 antibodies, respectively. As a control, PEPT1<sup>-/-</sup> organoids show specific SGLT1 staining and vice versa. **(c)** *Glut5* mRNA expression in SI organoids derived from WT mice. mRNA levels of the housekeeping gene *Hprt* serve as control. **(d)** Apical colocalization of villin and transporters. **(e, f)** Permeability of sodium fluorescein (NaFI) and FITC-Dextran 4 kDa (FD4), both accumulating in the organoid lumen.

# Supplementary Figure S2

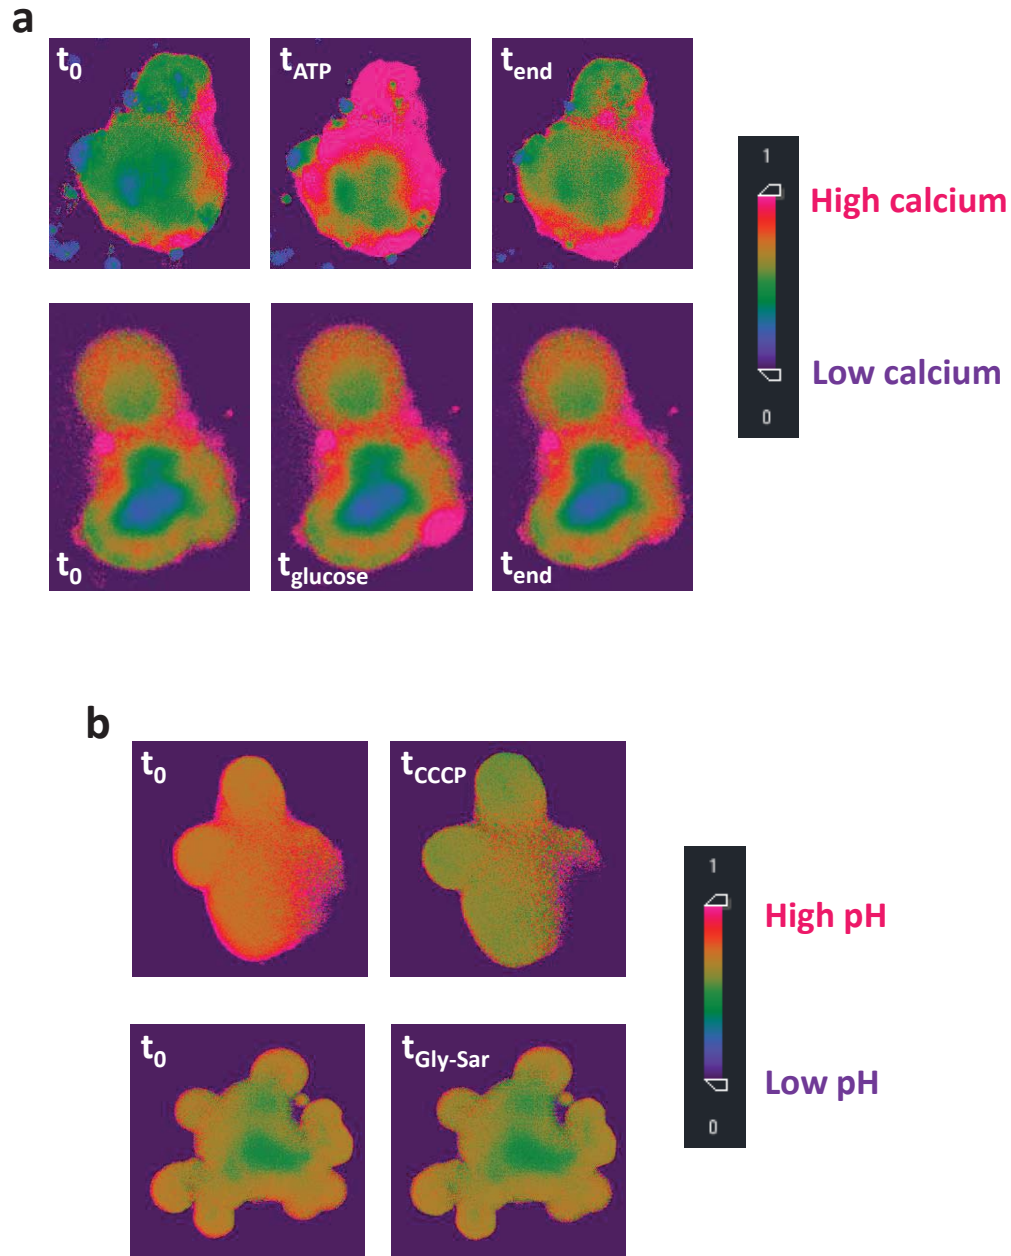

**Supplementary Figure S2: Live-cell imaging of intracellular calcium and acidification in WT organoids. (a)** Calcium responses to 100  $\mu\text{M}$  ATP (upper panel) and 50 mM glucose (lower panel) in WT organoids. Ratio of fluorescence intensities  $F(\lambda_{\text{ex}}340 \text{ nm})/F(\lambda_{\text{ex}}380 \text{ nm})$  display changes in intracellular calcium levels according to the color legend. **(b)** Intracellular acidification of organoid epithelial cells upon treatment with the protonophore CCCP (upper panel) and 50 mM Gly-Sar (lower panel), ratio images. Ratio of fluorescence intensities  $F(\lambda_{\text{ex}}490 \text{ nm})/F(\lambda_{\text{ex}}450 \text{ nm})$  display changes in intracellular pH according to the color legend.
